# Supplementary material for: Heterogeneous Cu–Fe oxide catalysts for preferential CO oxidation (PROX) in H2-rich process streams
Source: Royal Society of Chemistry journal article supplement (doi:10.1039/d0ra06969h), 2020-01-01
Supplement: d0ra06969h1.pdf [file d0ra06969h1.pdf]

### Electronic Supplementary Information

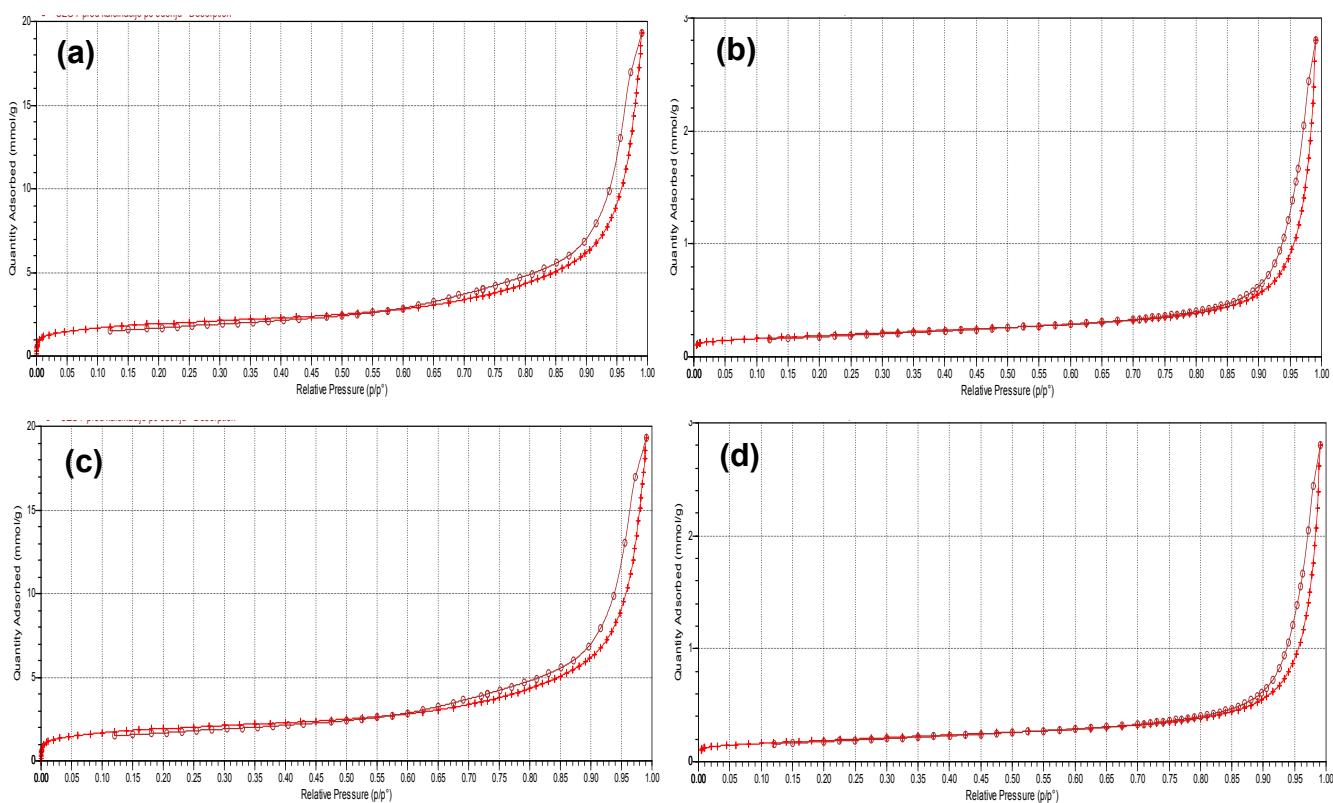

**Figure S1:** N<sub>2</sub> physisorption isotherms of (a) Cu-Fe/Al<sub>2</sub>O<sub>3</sub>, (b) CuFe<sub>2</sub>O<sub>4</sub>, (c) Cu/CuFe<sub>2</sub>O<sub>4</sub> and (d) Fe/CuFe<sub>2</sub>O<sub>4</sub> catalyst
